# Supplementary material
Source: PubMed Central journal article supplement (PMC6610606)

## Supplemental Tables and Figures

Figure S1A: Scatter Plots for Selected CGM Metrics at Month 6

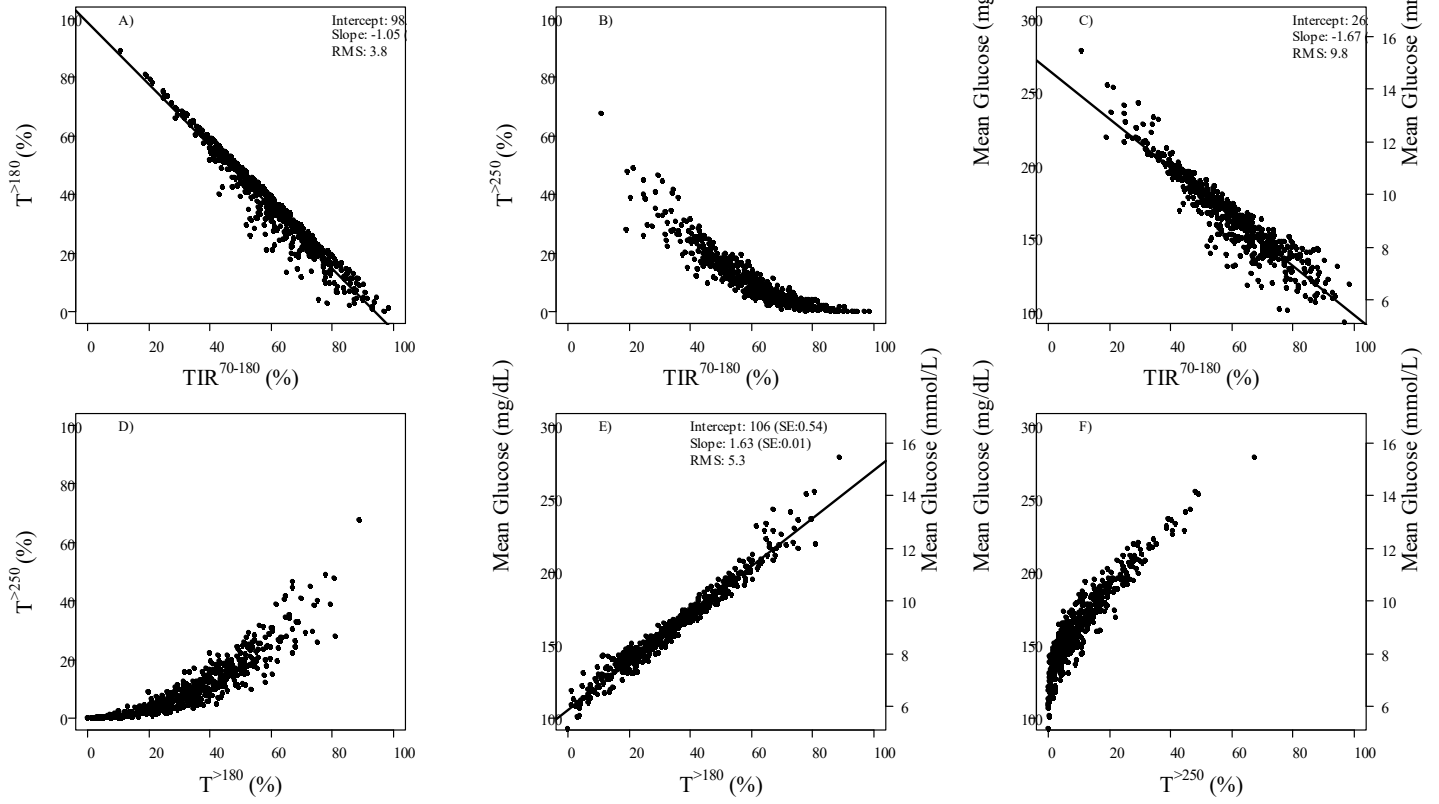

Figure S1B: Scatter Plots for Selected CGM Metrics at Baseline

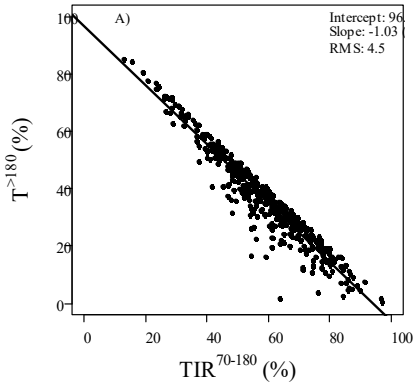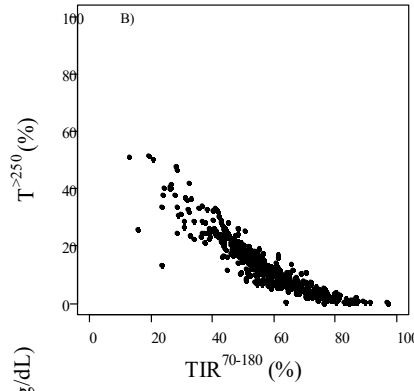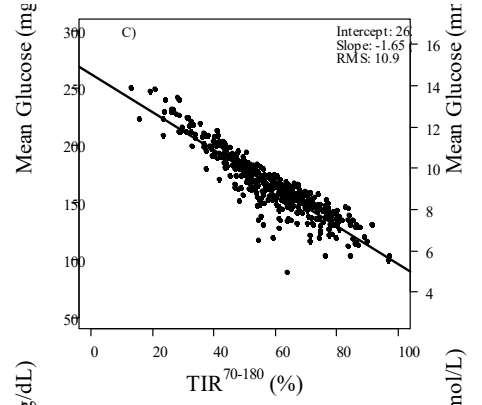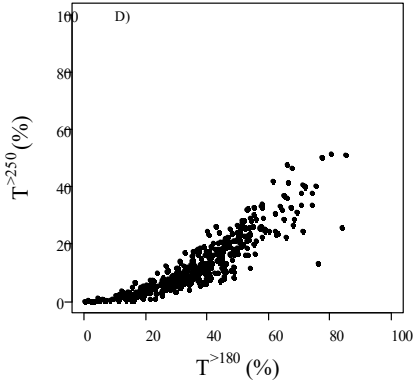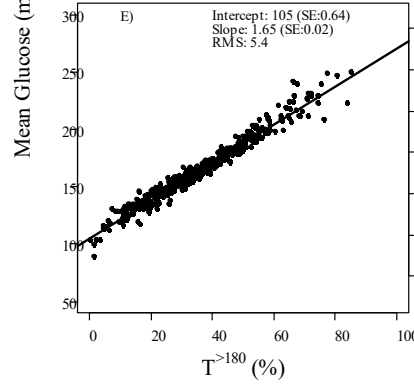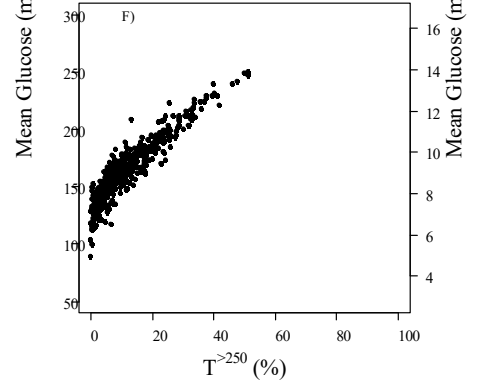

**Figure S2: TIR<sup>70-180</sup> vs TIR<sup>70-140</sup> at Baseline and Month 6**

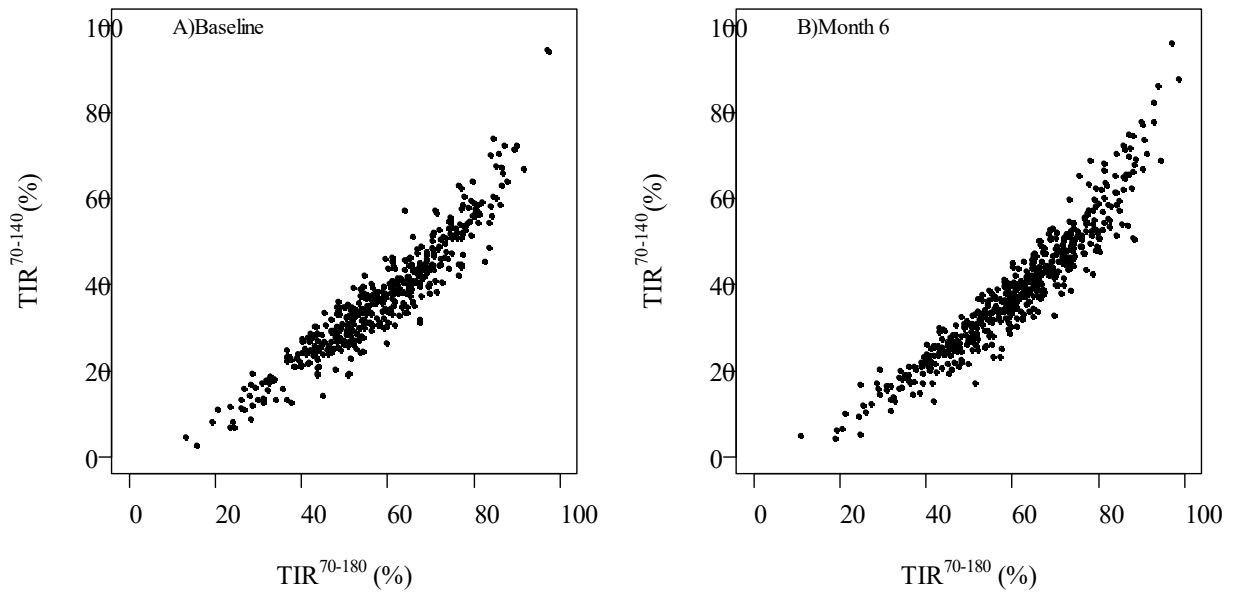

**Figure S3: Scatter Plots for Selected CGM Metrics with A1C at Baseline (RMS=root mean square error)**

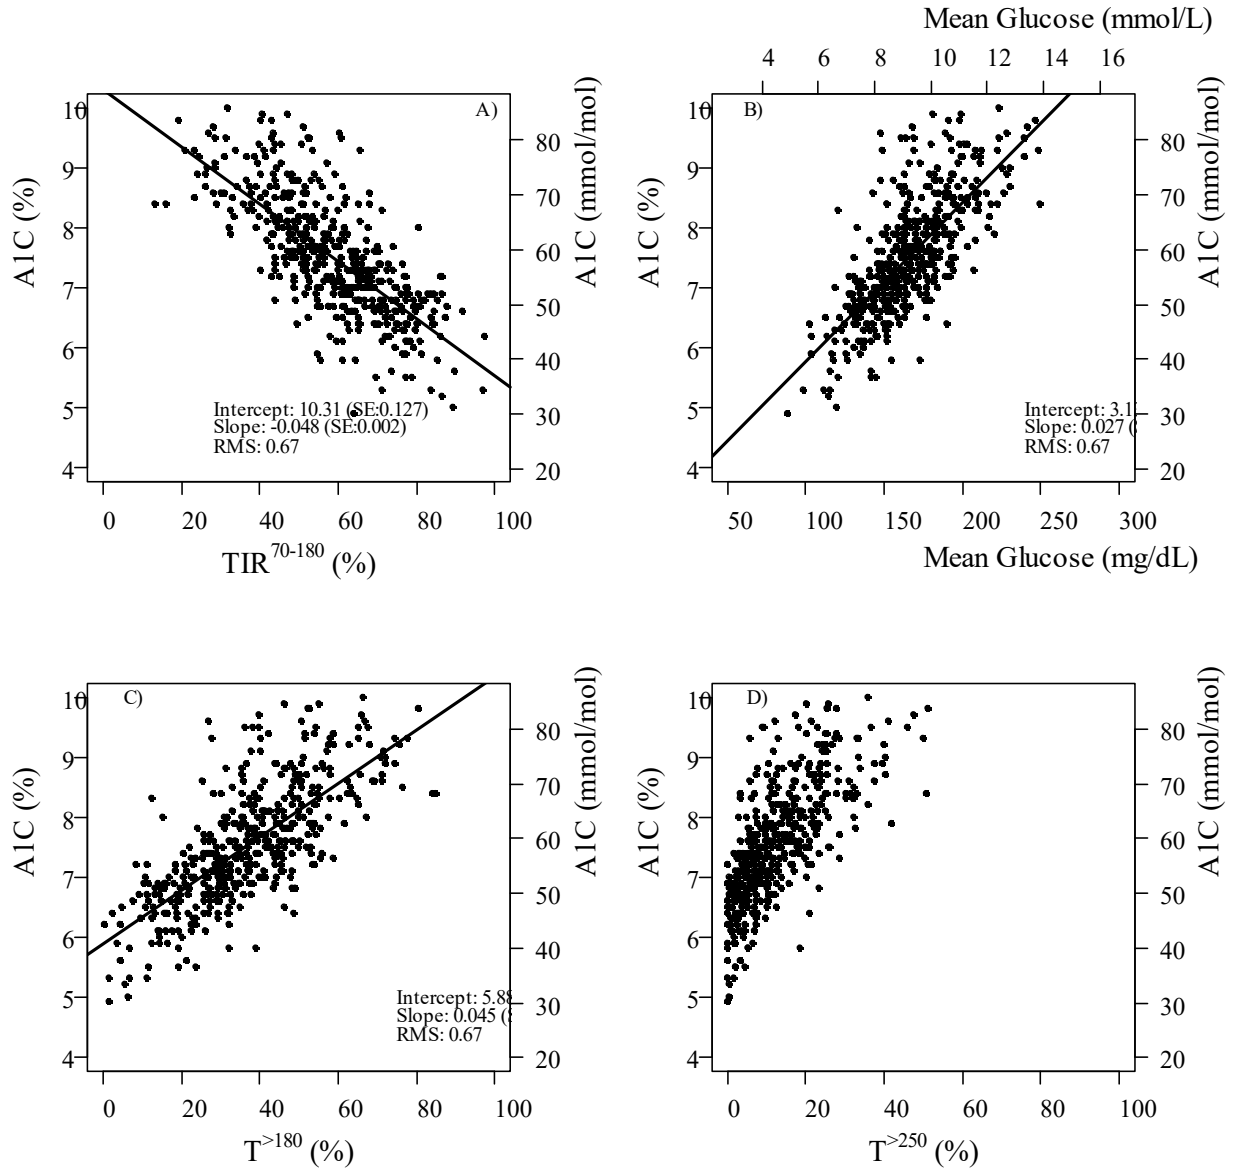

**Figure S4: Scatter Plots for A1C with Selected CGM Metrics at Month 6 (RMS=root mean square error)**

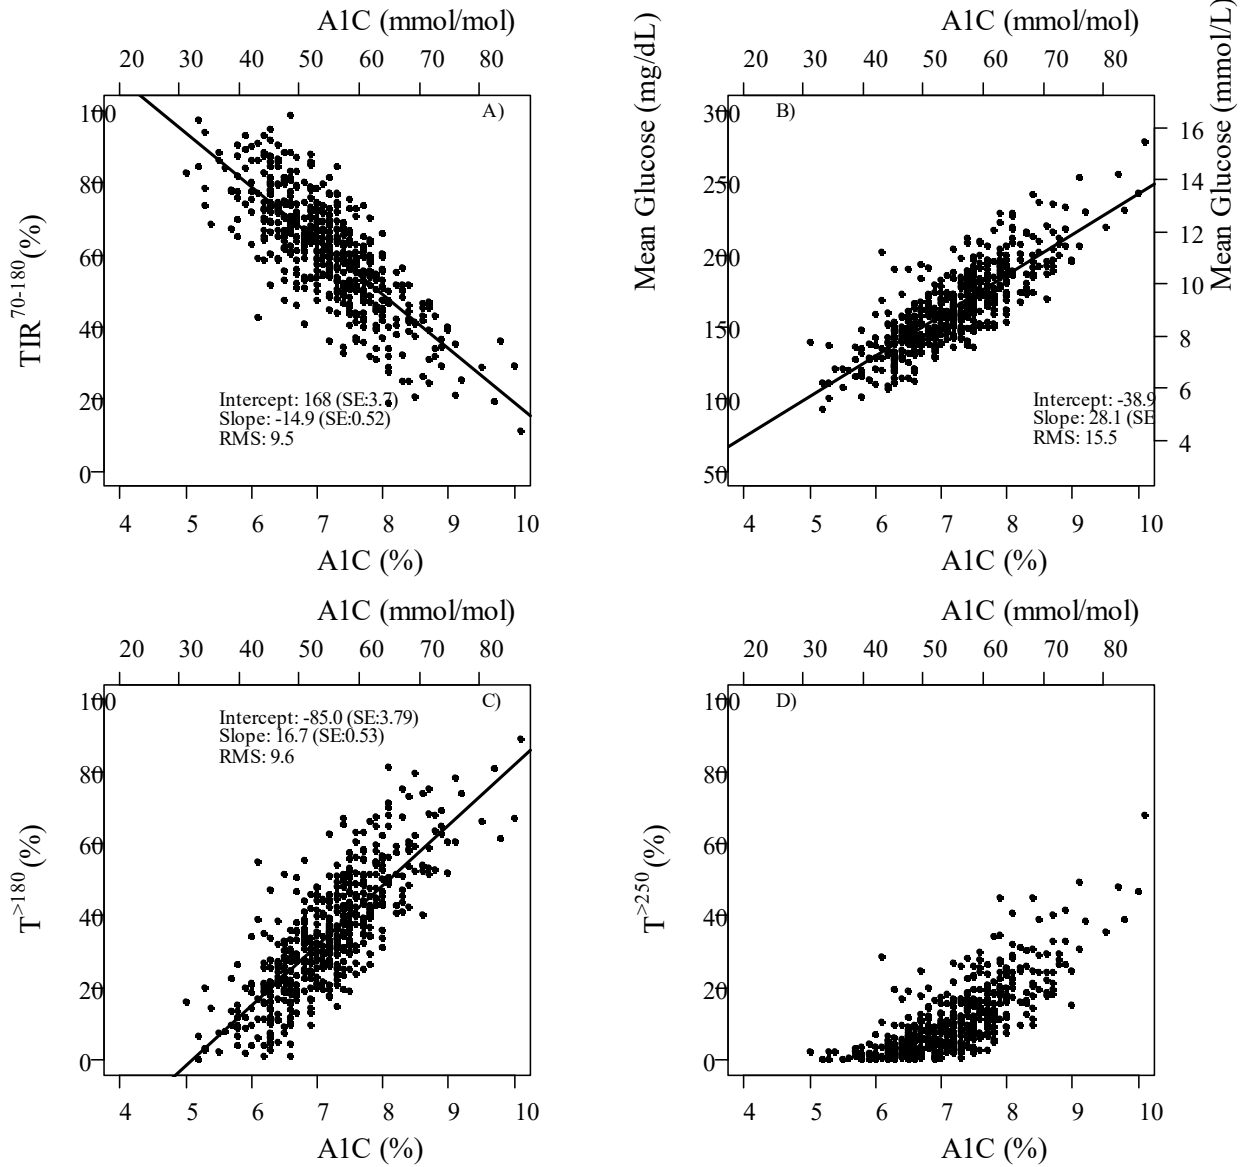

**Figure S5: Scatter Plots for TIR<sup>70-140</sup> with A1C at Baseline and Month 6 (RMS=root mean square error)**

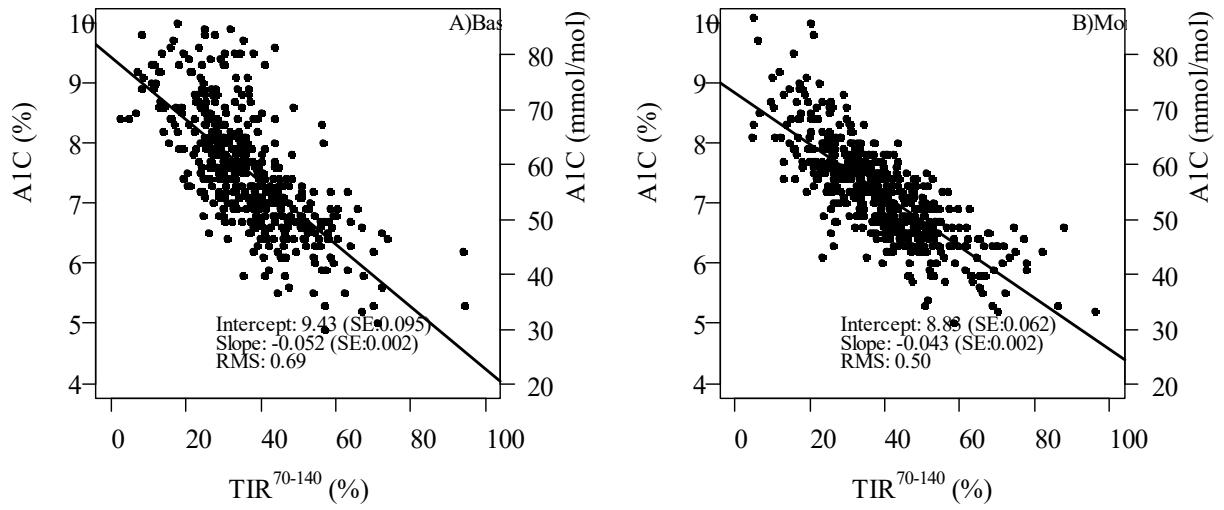

**Figure S6: Scatter Plots for Change in TIR<sup>70-140</sup> versus Change in A1C (slopes were forced to be same across subgroups; RMS=root mean square error)**

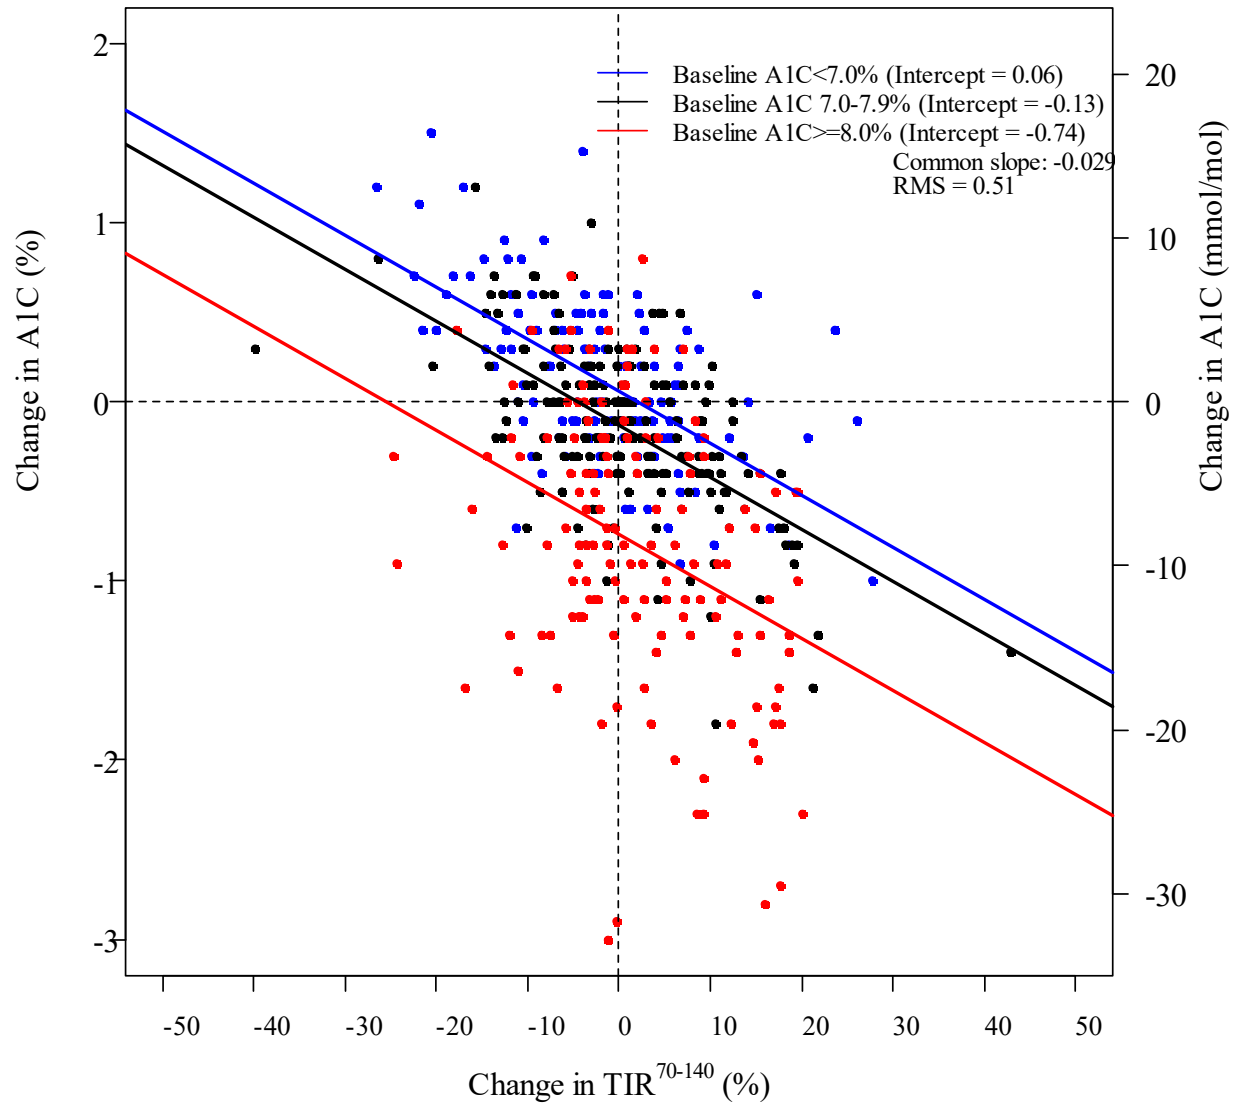

Supplement: BECK_Supplementary_File_2.pdf [file BECK_Supplementary_File_2.pdf]
